# Supplementary material for: Polymersome formation induced by encapsulation of water-insoluble molecules within ABC triblock terpolymers
Source: Royal Society of Chemistry journal article supplement (doi:10.1039/d0py00426j), 2020-01-01
Supplement: d0py00426j1.pdf [file d0py00426j1.pdf]

Electronic Supplementary Information (ESI)

**Polymersome formation induced by encapsulation of water-insoluble molecules within ABC triblock terpolymers**

*Rintaro Takahashi,<sup>\*a‡</sup> Shotaro Miwa,<sup>a‡</sup> Carsten Rössel,<sup>b</sup> Shota Fujii,<sup>a</sup> Ji Ha Lee,<sup>a</sup>  
Felix H. Schacher,<sup>b</sup> Kazuo Sakurai<sup>\*a</sup>*

*<sup>a</sup>Department of Chemistry and Biochemistry, University of Kitakyushu, 1-1, Hibikino, Wakamatsu-ku, Kitakyushu, Fukuoka, 808-0135, Japan*

*<sup>b</sup>Institute of Organic Chemistry and Macromolecular Chemistry, Friedrich Schiller University Jena, Lessingstraße 8, D-07743 Jena, Germany, and Jena Center for Soft Matter (JCSM), Friedrich Schiller University Jena, Philosophenweg 7, 07743 Jena, Germany*

*<sup>\*</sup>(R.T.) E-Mail: r-takahashi@kitakyu-u.ac.jp., (K.S.) E-mail: sakurai@kitakyu-u.ac.jp.*

*<sup>‡</sup>These authors equally contributed to this work.*

## Scattering Function of the Polymersome Bilayer

The scattering function for a large shell with the core corona cross-sectional structure was calculated using eq 1 in the main text.<sup>S1</sup>  $P_0(q)$  denotes the form factor of an infinitely thin shell, and  $E_{\text{core}}(q)$ ,  $E_{\text{corona}}(q)$ , and  $E_{\text{chain}}(q)$  denote the scattering amplitudes from the core, corona, and individual corona chain, given by

$$P_0 = \left[ \frac{\sin(qR_{\text{ves}})}{qR_{\text{ves}}} \right]^2 \quad (\text{S1})$$

$$E_{\text{core}}(q) = \frac{\sin\left(\frac{qL}{2}\right)}{\frac{qL}{2}} \quad (\text{S2})$$

$$E_{\text{corona}}(q) = \frac{1 - \exp(-q^2\langle S^2 \rangle_{\text{corona}})}{q^2\langle S^2 \rangle_{\text{corona}}} \cos \left[ q \left( \frac{L}{2} + \langle S^2 \rangle_{\text{corona}}^{\frac{1}{2}} \right) \right] \quad (\text{S3})$$

$$E_{\text{chain}}^2(q) = \frac{2[\exp(-q^2\langle S^2 \rangle_{\text{corona}}) - 1 + q^2\langle S^2 \rangle_{\text{corona}}]}{q^4\langle S^2 \rangle_{\text{corona}}^2} \quad (\text{S4})$$

$R_{\text{ves}}$  is the radius of the thin shell. Note that eq S1 forms the framework of the shell-like structure (vesicle), and eqs S2–S4 consider the cross-sectional structure.

## Reference

- (1) Pedersen, S. P.; Form Factors of Block Copolymer Micelles with Spherical, Ellipsoidal and Cylindrical Cores. *J. Appl. Cryst.* **2000**, *33*, 637–640.
